# Supplementary material for: Engineering the electronic and magnetic properties of d0 2D dichalcogenide materials through vacancy doping and lattice strains
Source: Royal Society of Chemistry journal article supplement (doi:10.1039/c5cp07548c), 2016-01-01
Supplement: c5cp07548c1.pdf [file c5cp07548c1.pdf]

Electronic Supplementary Information

***Engineering the electronic and magnetic properties of  
 $d^0$  2D dichalcogenide materials through vacancy  
doping and lattice straining***

**L. Ao,<sup>a,b</sup> A. Pham,<sup>a\*</sup> H. Y. Xiao,<sup>b\*</sup> X. T. Zu,<sup>b</sup> and S. Li<sup>a</sup>**

*<sup>a</sup>School of Material Science and Engineering, University of New South Wales, Sydney  
2052, Australia*

*<sup>b</sup>School of Physical Electronics, University of Electronic Science and Technology of  
China, Chengdu 610054, China*

*E-mail: [anh.pham@unsw.edu.au](mailto:anh.pham@unsw.edu.au)*

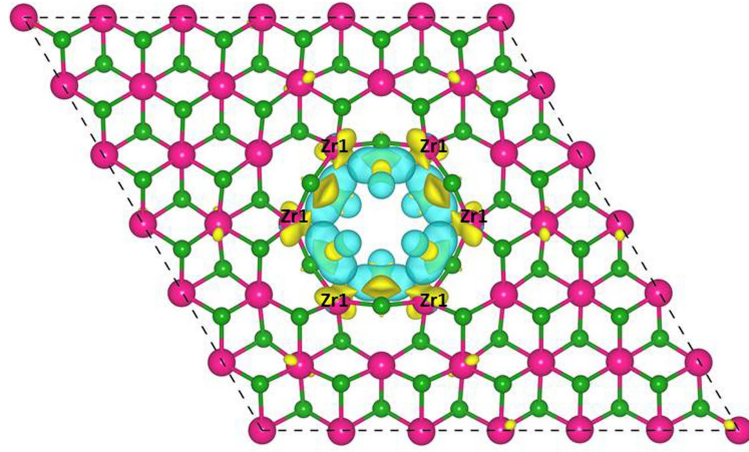

Fig. S1 Charge density difference of V-ZrS<sub>6</sub> doped ZrS<sub>2</sub> monolayer. The yellow and blue isosurfaces show the electron accumulation and depletion, respectively. The isosurface value is taken as 0.004 eV/Å<sup>3</sup>. The atoms color coding is the same as in Fig. 1.

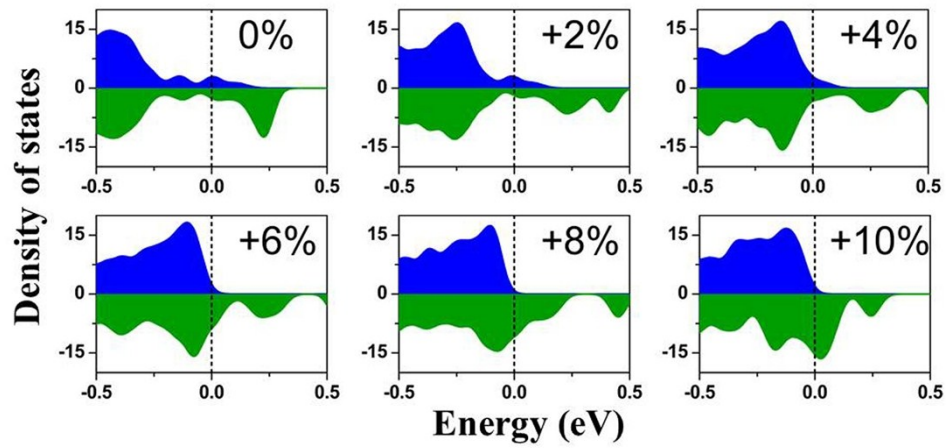

Fig. S2 Partial density of states for S-atoms  $p$  orbitals in V-Zr doped  $ZrS_2$  monolayer at the energy window of -0.5 eV to 0.5 eV. The spin up and spin down parts are shaded by blue and green colors, respectively. The Fermi levels are all set to zero, which are indicated by black dashed line.

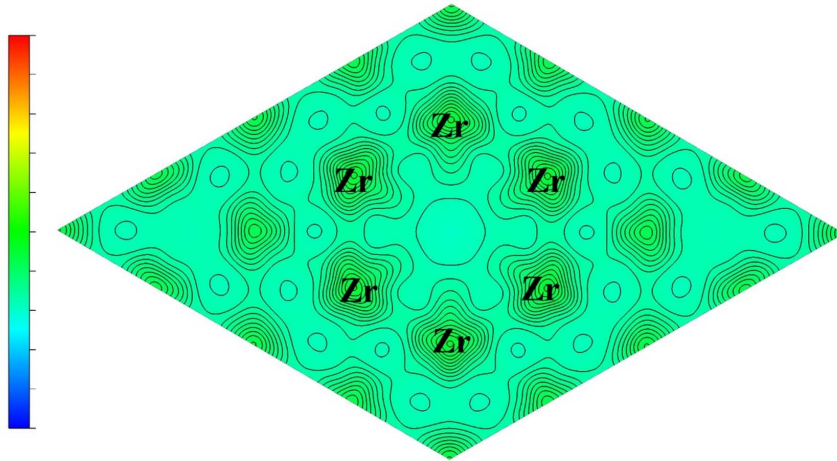

Fig. S3 Partial charge density projected on the Zr atom plane at the energy range from -1 eV to 0 eV relative to the Fermi level for the V-Zr doped  $\text{ZrS}_2$  monolayer at the -8% strain.
